# Supplementary material for: Heterologous expression of a thermophilic diacylglycerol acyltransferase triggers triglyceride accumulation in Escherichia coli
Source: PubMed Central journal article supplement (PMC5407786; doi:10.1371/journal.pone.0176520), 2017-04-27
Supplement: pone.0176520.s009.pdf [file pone.0176520.s009.pdf]

**Table 1S – Peak attributions of lipid extracts <sup>1</sup>H NMR spectra.**

Chemical shift assignments of <sup>1</sup>H NMR signals indicated in Figure 5. Abbreviations: s, singlet; d, doublet; t, triplet; m, multiplet.

| Peak         | Chemical shift, $\delta$ (ppm) | Multiplicity    | Proton/<br>Functional group                                                                          | Attribution                                     | Reference                     |
|--------------|--------------------------------|-----------------|------------------------------------------------------------------------------------------------------|-------------------------------------------------|-------------------------------|
| <b>a, a'</b> | 0.07                           | s               | CH <sub>3</sub> [Si(CH <sub>3</sub> ) <sub>2</sub> O] <sub>n</sub> Si(CH <sub>3</sub> ) <sub>3</sub> | Silicone grease:<br>Polydimethylsiloxane (PDMS) | Gottlieb et al.,<br>1997      |
| <b>b, b'</b> | 0.50-0.60                      | m               |                                                                                                      |                                                 |                               |
| <b>C, c'</b> | 0.60-0.69                      | Broad<br>signal |                                                                                                      |                                                 |                               |
| <b>D, d'</b> | 0.88                           | t               | -CH <sub>3</sub>                                                                                     | Terminal methyl protons in every<br>acyl chain  | Vlahov 1999                   |
| <b>E, e'</b> | 0.92-0.99                      | Broad<br>signal | -CH <sub>3</sub>                                                                                     | <sup>13</sup> C satellite of signal at 0.88 ppm | Alonso-Salces et<br>al., 2012 |
| <b>F, f'</b> | 1.00-1.16                      | Broad<br>signal |                                                                                                      |                                                 |                               |
| <b>G, g'</b> | 1.25                           |                 | -CH <sub>2</sub> -                                                                                   | Methylene envelop of various<br>compounds       | Vlahov 1999                   |
| <b>h</b>     | 1.36                           |                 |                                                                                                      |                                                 |                               |

|              |                |              |                                                        |                                                                                                                            |                                           |
|--------------|----------------|--------------|--------------------------------------------------------|----------------------------------------------------------------------------------------------------------------------------|-------------------------------------------|
| <b>i, i'</b> | 1.59           |              | -OCO-CH <sub>2</sub> -CH <sub>2</sub> -                | H-3 protons of acyl moieties in acylglyceric or ester compounds                                                            | Vlahov 1999                               |
| <b>j, j'</b> | 2.01           | Broad signal | =CH-CH <sub>2</sub> -                                  | Allylic methylenes                                                                                                         | Vlahov 1999                               |
| <b>k, k'</b> | 2.29           | m            | i) HOOC-CH <sub>2</sub> -<br>ii) -CO-CH <sub>2</sub> - | i) Methylene protons adjacent to a carboxylic group<br>ii) H-2 protons of acyl moieties in acylglyceric or ester compounds | Alonso-Salces et al., 2012<br>Vlahov 1999 |
| <b>l, l'</b> | 3.22/3.28/3.18 | Broad signal |                                                        |                                                                                                                            |                                           |
| <b>m</b>     | 3.65           | d            | -CH <sub>2</sub> OH                                    | Glyceryl group in DAGs                                                                                                     | Alonso-Salces et al., 2012                |
| <b>n, n'</b> | 3.90-4.04      | Broad signal |                                                        |                                                                                                                            |                                           |
| <b>o, o'</b> | 4.05-4.23      | m            | CH-OH<br>-CH <sub>2</sub> -OR                          | Glycerol group in DAGs<br>H-1/H-3 proton of glycerol group TAG                                                             | Almoselhy 2014<br>Vlahov 1999             |
| <b>p, p'</b> | 4.30-4.44      | d            | -CH <sub>2</sub> -OR                                   | H-1/H-3 proton of glycerol group TAG                                                                                       | Vlahov 1999                               |
| <b>q</b>     | 5.10           | m            |                                                        |                                                                                                                            |                                           |

|              |                     |                 |        |                                         |                          |
|--------------|---------------------|-----------------|--------|-----------------------------------------|--------------------------|
| <b>r, r'</b> | 5.16-5.26           | Broad<br>signal | >CH-OR | H-2 proton in TAGs                      | Vlahov 1999              |
| <b>s, s'</b> | 5.29                | t               | =CH-   | All UFA                                 | Vlahov 1999              |
| <b>t, t'</b> | 7.26<br>(not shown) |                 |        | CDCl <sub>3</sub> solvent residual peak | Gottlieb et al.,<br>1997 |

---
