# Supplementary material for: Heterologous expression of a thermophilic diacylglycerol acyltransferase triggers triglyceride accumulation in Escherichia coli
Source: PubMed Central journal article supplement (PMC5407786; doi:10.1371/journal.pone.0176520), 2017-04-27
Supplement: pone.0176520.s010.pdf [file pone.0176520.s010.pdf]

**Table 2S. Assignments of the different peaks of the  $^1\text{H}$  NMR spectra of purified TAG compounds.**

Chemical shift attributions of  $^1\text{H}$  NMR signals indicated in Figure S7. Abbreviations: s, singlet; d, doublet; dd, doublet of doublets; t, triplet; m, multiplet.

| Peak Name (agree with figure) | Chemical Shift, $\delta$ (ppm) | Peak multiplicity | Assigned number of H's | Proton-Functional group                                                                                                                                          |
|-------------------------------|--------------------------------|-------------------|------------------------|------------------------------------------------------------------------------------------------------------------------------------------------------------------|
| <b>a/a'</b>                   | 0.89/0.88                      | t                 | 9                      | $-\text{CH}_3 \rightarrow$ (terminal methyl protons of saturated and unsaturated chains)                                                                         |
| <b>b'</b>                     | 1.25                           | Broad signal      | ~70                    | $-\text{CH}_2-$ $\rightarrow$ (Protons of methylene envelop)                                                                                                     |
| <b>c/c'</b>                   | 1.59/1.57                      | m                 | 6                      | $-\text{COO}-\text{CH}_2-\text{CH}_2-$ $\rightarrow$ (H-3 protons of acyl moieties in triacylglycerols)<br>$\text{H}_2\text{O} \rightarrow$ (residual molecules) |
| <b>d'</b>                     | 2.01                           | m                 | 4                      | $=\text{C}-\text{CH}_2-$ $\rightarrow$ (allylic methylenes)                                                                                                      |
| <b>e/e'</b>                   | 2.25/2.31                      | t                 | 6                      | $\text{COO}-\text{CH}_2-$ $\rightarrow$ (H-2 protons of acyl moieties in triacylglycerols)                                                                       |
| <b>f/f'</b>                   | 4.10/4.14                      | dd                | 2                      | $-\text{CH}_2-\text{OR} \rightarrow$ (H-1 and H-3 protons of glycerol,<br>the assignments are interchangeable)                                                   |
| <b>g/g'</b>                   | 4.25/4.29                      | dd                | 2                      |                                                                                                                                                                  |
| <b>h/h'</b>                   | 5.23/5.26                      | m                 | 1                      | $>\text{CH}-\text{OR} \rightarrow$ (H-2 of the glycerol backbone)                                                                                                |
| <b>i'</b>                     | 5.35                           | t                 | 2                      | $=\text{CH}- \rightarrow$ (olefinic protons of unsaturated FA)                                                                                                   |
