# Supplementary material for: Heterologous expression of a thermophilic diacylglycerol acyltransferase triggers triglyceride accumulation in Escherichia coli
Source: PubMed Central journal article supplement (PMC5407786; doi:10.1371/journal.pone.0176520), 2017-04-27
Supplement: pone.0176520.s011.pdf [file pone.0176520.s011.pdf]

**S1 File. DNA sequence of the protein tDGAT codon-optimized for *E. coli***

atgctcagt taacagcagt tgatgcaaat tttctgaatg ttgaaaccgg caccacccat  
gcacatattg caggtctggg tattctggat ccggttgcac gtccgggtgg tcgtctgacc  
gcagaagatc tgattgaagt tattcgtgaa cgtgcacatc tggcaccgcg tccgctgcgc  
atgctctgg ctgcagtcc gctgggtatt gatcgtccgt attgggaaga tgatccgat  
ttgatccgg cacgtcatgt ttttgaagtt ggtctgcctg caccgggtaa tgcagctcag  
ctggcagatg ttgttgaat gctgcatgaa cgtcctctgg atcgtgcacg tccgctgtgg  
gaagcagttg ttattcaggg tctggaaggt ggtcgtaccg cagtttatat taaagttcat  
catgcagccg ttgatggtgt tctggcaacc gaaaccctgg cagcactgct ggatctgagt  
ccgcagcctc gtgaactgcc tccggacgat accgttccgc agcaggcacc ggactggca  
gaacgtgttc gtaccggtct gctgcgtgca ctggcacatc cggttcgtgg tgcacgatg  
ctggcacgta ccgcaccgta tctggatgaa attccgggtc tggcacagct gcctggtgtt  
cagcctctgg cacgcgcaat tcagggtgca ctgggtcgtg atggtgttgt tccgctgcct  
cgtaccgttg cacctccgac cccgtttaat ggcaccatta gcgcacgtcg tgcagttgca  
ttggcgaac tgccgctggc agaaattcgt cgtattcgtc gcgaactggg tggtagcgtt  
aatgatgttg ttatggcact ggttgaacc gcactgcatc gttggctgga taaacgtggt  
gaactgccgg atcgtccgct gttgacagcc gttccggta gcctgcgtcg tggccgtgat  
ggtgatgcag ccggtggtaa tcgtatgagc gcaatggtta cacctctggc aacctatctg  
gcagatccgg cagaacgttt tgcagcaatt cgtggtgatc tggcagcagc aaaacgtcgc  
ttgacagta gcagcgtgc atggctggaa ggtctgagcg aactggtcc ggcacctctg  
gcaggccgc tgctgcgtct ggcactgcag gcacgtccgg gtgaatatct gcgtccggtt  
aatctgctgg ttagcaatgt tccgggtccg gattttccgc tgtatctgcg tgggtcccgt  
gttctgggtt atttccgat tagcgttgtt agcgatctga ccggtggtct gaatattacc  
gttctgagct atgatggcaa actggatggt ggtattgta cctgtcgtca gatgattccg  
gatccgtggg aaattatgga tcactctggat gatgcactgg gtgaactgcg tggctctgatt  
gatggt
